# Supplementary material
Source: PubMed Central journal article supplement (PMC7963450)
Supplement: NIHMS1672096-supplement-Appendix.pdf [file NIHMS1672096-supplement-Appendix.pdf]

**Appendix 1. Cohort 1 Study Sites, Principal Investigators, and Number of Patients per Site**

| <b>Study Site*</b>                                                                               | <b>Principal Investigator</b> | <b>Number of Patients Per Site</b> |
|--------------------------------------------------------------------------------------------------|-------------------------------|------------------------------------|
| Comprehensive Clinical Trials, LLC, West Palm Beach, FL 33409, United States                     | Ackerman, Ronald              | 11                                 |
| Northeast Clinical Research of San Antonio, Schertz, TX 78154, United States                     | Akright, Bruce                | 1                                  |
| Clinical Trials Management, LLC, Metairie, LA 70006, United States                               | Alexander, Samuel             | 3                                  |
| Visions Clinical Research, Boynton Beach, FL 33472, United States                                | Aqua, Keith                   | 6                                  |
| Eastern Virginia Medical School, 6Norfolk, VA 23507, United States                               | Archer, David                 | 2                                  |
| Omega Research Consultants, LLC, Debary, FL 32713, United States                                 | Ayesu, Kwabena                | 2                                  |
| Wake Research Associates, LLC, Raleigh, NC 27612, United States                                  | Bhiwandiwalla, Pouru          | 16                                 |
| Mount Vernon Clinical Research, LLC, Sandy Springs, GA 30328, United States                      | Blank, Stephen                | 8                                  |
| Springfield Clinic, Dept Clinical Research, Springfield, IL 62703, United States                 | Bradley, E. Michael           | 1                                  |
| Gyn-Care, Inc., Atlanta, GA 30308, United States                                                 | Brown, Eric                   | 14                                 |
| UT Southwestern Medical Center, Dallas, TX 75390-9032, United States                             | Carr, Bruce                   | 2                                  |
| Healthcare Clinical Data, Inc., North Miami, FL 33161, United States                             | Chavoustie, Steven            | 7                                  |
| Axis Clinical Trials, Los Angeles, CA 90017, United States                                       | Clarke, Patrick               | 8                                  |
| Gynecology Reproductive, Endocrinology and Fertility Inst, Santurce, 00909, Puerto Rico          | Cruz-Burgos, Rosa             | 2                                  |
| The South Bend Clinic Granger, Granger, IN 46530, United States                                  | Durbin, Edward                | 1                                  |
| Miami Research Associates, South Miami, FL 33143, United States                                  | Feldman, Robert               | 9                                  |
| Womens Clinical Research, Encinitas, CA 92024, United States                                     | Fenton, Douglas               | 2                                  |
| University Hospitals of Cleveland, MacDonald Womens Hospital, Cleveland, OH 44106, United States | Gangestad, Angelina           | 2                                  |
| Dr. Phyllis Gee, Frisco, TX, Frisco, TX 75035, United States                                     | Gee, Phyllis                  | 2                                  |

Carr BR, Stewart EA, Archer DF, Al-Hendy A, Bradley L, Watts NB, et al. Elagolix alone or with add-back therapy in women with heavy menstrual bleeding and uterine leiomyomas: a randomized controlled trial. *Obstet Gynecol* 2018; 132.

The authors provided this information as a supplement to their article.

©2018 American College of Obstetricians and Gynecologists.

|                                                                                                                     |                          |    |
|---------------------------------------------------------------------------------------------------------------------|--------------------------|----|
| Masters of Clinical Research, Inc., Augusta, GA 30909, United States                                                | Grossman, Peter          | 4  |
| North Spokane Women's Health, Spokane, WA 99207, United States                                                      | Hardy, Ronald            | 1  |
| Axis Clinical Trials, Los Angeles, CA 90036, United States                                                          | Hazan, Lydie             | 13 |
| Clinical Trials of Texas, Inc., San Antonio, TX 78229, United States                                                | Hedges, Parke            | 3  |
| Great Lakes Research Group, Inc., Bay City, MI 48706, United States                                                 | Heilbronn, Jr., Duane    | 2  |
| The Woman's Hospital of Texas, Clinical Research Center, Clinical Research Center, Houston, TX 77054, United States | Hurtado, Sandra          | 5  |
| Research Across America, Dallas, TX 75234, United States                                                            | Kapusta, Ronald          | 1  |
| Magnolia Ob/Gyn Research Center, Myrtle Beach, SC 29572, United States                                              | Kirkpatrick, Helena      | 1  |
| Precision Research Organization, LLC., Miami Lakes, FL 33016, United States                                         | Klein, Robert            | 7  |
| Medical Center for Clinical Research, San Diego, CA 92108, United States                                            | Koltun, William          | 3  |
| Altus Research, Inc, Lake Worth, FL 33461, United States                                                            | Lederman, Samuel         | 8  |
| Carolina Women's Research and, Wellness Center, Durham, NC 27713, United States                                     | Lukes, Andrea            | 2  |
| Mobile, Ob-Gyn, P.C., Mobile, AL 36608, United States                                                               | Madonia, Phillip         | 2  |
| Eastern Carolina Women's Center, New Bern, NC 28562, United States                                                  | Michelson, Jeffrey       | 2  |
| Instituto Chileno de Medicina, Reproductiva (ICMER), Santiago, Chile                                                | Miranda, Maria           | 4  |
| Vista Clinical Research, Columbia, SC 29201, United States                                                          | Moore, John              | 3  |
| Tidewater Physicians for Women, Norfolk, VA 23502, United States                                                    | Morgan, Jr., Franklin    | 3  |
| SUNY Downstate Medical Ctr, Brooklyn, NY 11203, United States                                                       | Muneyyirci-Delale, Ozgul | 4  |
| St. Johns Center for Clinical Research, Ponte Vedra Beach, FL 32081, United States                                  | Myers, Richard           | 2  |
| University of Toledo-HSC, Toledo, OH 43614, United States                                                           | Neuhoff, Ronica          | 1  |
| Futura Research, Inc., Norwalk, CA 90650, United States                                                             | Nieto, Sandra            | 1  |
| KO Clinical Research, LLC, Fort Lauderdale, FL 33316, United States                                                 | Osman, Khadra            | 6  |
| Lyndhurst Clinical Research, Winston-Salem, NC 27103, United States                                                 | Parker, Jr., Robert      | 3  |
| Women Under Study, New Orleans, LA 70115, United States                                                             | Perez, Brandon           | 3  |

Carr BR, Stewart EA, Archer DF, Al-Hendy A, Bradley L, Watts NB, et al. Elagolix alone or with add-back therapy in women with heavy menstrual bleeding and uterine leiomyomas: a randomized controlled trial. *Obstet Gynecol* 2018; 132.

The authors provided this information as a supplement to their article.

©2018 American College of Obstetricians and Gynecologists.

|                                                                                                             |                          |   |
|-------------------------------------------------------------------------------------------------------------|--------------------------|---|
| Advances in Health, Inc., Houston, TX 77030, United States                                                  | Poindexter, Alfred       | 7 |
| South Florida Clinical Research, Institute, LLC, Margate, FL 33063, United States                           | Reynolds, Ivonne         | 3 |
| Clinica Davila, Departamento de Ginecologia, Santiago, Chile                                                | Roa, Eutimio             | 1 |
| Dr. Henry Rodriguez Ginorio, San Juan, 00917, Puerto Rico                                                   | Rodriguez Ginorio, Henry | 6 |
| MacArthur OB/GYN, Irving, TX 75062, United States                                                           | Sakovich, Stephen        | 3 |
| Complete Healthcare for Women, Columbus, OH 43231, United States                                            | Samuel, Milroy           | 4 |
| Billings Clinic Research Center, Billings, MT 59101, United States                                          | Severa, Larry            | 1 |
| Memphis Research Associates, LLC, Memphis, TN 38101, United States                                          | Simha, Samuel            | 9 |
| James A. Simon, MD, PC, Washington, DC 20036, United States                                                 | Simon, James             | 5 |
| DCT-Genesis HCWC, LLC, dba Discovery Clinical Trials, Dallas, TX 75231, United States                       | Smith, Liesl             | 3 |
| Grossmont Center for Clinical, Research, La Mesa, CA 91942, United States                                   | Smith-Nguyen, Gioi       | 4 |
| Center for Womens Research, Chicago, IL 60612, United States                                                | Soltes, Barbara          | 8 |
| Alabama Clinical Therapeutics, LLC, Birmingham, AL 35235, United States                                     | Summers, William         | 2 |
| Clinical Trials Management, LLC, Mandeville, LA 70471, United States                                        | Tydings, Albert          | 3 |
| Premier Urology Associates, LLC dba, AdvanceMed Research, Lawrenceville, NJ 08648, United States            | Ung, Kenneth             | 2 |
| Instituto de Investigaciones Materno, Infantil (IDIMI), Hospital Clinic San Borja Arriaran, Santiago, Chile | Villarroel, Claudio      | 2 |
| Clinical Research of West Florida, Inc., Clearwater, FL 33765, United States                                | Walter, Thomas           | 3 |
| Atlanta Womens Research Institute, Atlanta, GA 30342, United States                                         | Zane, Richard            | 7 |

\*All listed sites had patients randomized in Cohort 1.

Carr BR, Stewart EA, Archer DF, Al-Hendy A, Bradley L, Watts NB, et al. Elagolix alone or with add-back therapy in women with heavy menstrual bleeding and uterine leiomyomas: a randomized controlled trial. *Obstet Gynecol* 2018; 132.

The authors provided this information as a supplement to their article.

©2018 American College of Obstetricians and Gynecologists.

**Appendix 2. Cohort 2 Study Sites, Principal Investigators, and Number of Patients per Site**

| <b>Study Site*</b>                                                                                          | <b>Principal Investigator</b> | <b>Number of Patients Per Site</b> |
|-------------------------------------------------------------------------------------------------------------|-------------------------------|------------------------------------|
| Comprehensive Clinical Trials, LLC, West Palm Beach, FL 33409, United States                                | Ackerman, Ronald              | 8                                  |
| Gyn-Care, Inc., Paramount Research Solutions, Atlanta, GA 30363, United States                              | Adams, Anthony                | 9                                  |
| Northeast Clinical Research of San, Antonio, Schertz, TX 78154, United States                               | Akright, Bruce                | 1                                  |
| University Hospitals of Leicester NHS, Trust HQ, Leicester, United Kingdom                                  | Al-Azzawi, Farook             | 2                                  |
| Clinical Trials Management, LLC, Metairie, LA 70006, United States                                          | Alexander, Samuel             | 8                                  |
| Visions Clinical Research, Boynton Beach, FL 33472, United States                                           | Aqua, Keith                   | 5                                  |
| Eastern Virginia Medical School, Norfolk, VA 23507, United States                                           | Archer, David                 | 2                                  |
| Omega Research Consultants, LLC, Debary, FL 32713, United States                                            | Ayesu, Kwabena                | 5                                  |
| Wake Research Associates, LLC, Raleigh, NC 27612, United States                                             | Bhiwandiwalla, Pouru          | 6                                  |
| Clinique OVO - OVO R and D, Montreal, QC H4P 2S4, Canada                                                    | Bissonnette, Francois         | 1                                  |
| Mount Vernon Clinical Research, LLC, Sandy Springs, GA 30328, United States                                 | Blank, Stephen                | 7                                  |
| Springfield Clinic, Dept Clinical Research, Springfield, IL 62703, United States                            | Bradley, E. Michael           | 1                                  |
| Gyn-Care, Inc., Atlanta, GA 30308, United States                                                            | Brown, Eric                   | 5                                  |
| UT Southwestern Medical Center, Dallas, TX 75390-9032, United States                                        | Carr, Bruce                   | 1                                  |
| Chattanooga GYN Oncology LLC, Chattanooga, TN 37403, United States                                          | Chamberlain, Donald           | 1                                  |
| Healthcare Clinical Data, Inc., North Miami, FL 33161, United States                                        | Chavoustie, Steven            | 5                                  |
| Axis Clinical Trials, Los Angeles, CA 90017, United States                                                  | Clarke, Patrick               | 6                                  |
| Univ Hosp Bristol NHS Foundation, Trust, St. Michaels University Hospital, Bristol, BS2 8EG, United Kingdom | Crouch, Naomi                 | 1                                  |
| Gynecology Reproductive, Endocrinology and Fertility Inst, Santurce, 00909, Puerto Rico                     | Cruz-Burgos, Rosa             | 1                                  |

Carr BR, Stewart EA, Archer DF, Al-Hendy A, Bradley L, Watts NB, et al. Elagolix alone or with add-back therapy in women with heavy menstrual bleeding and uterine leiomyomas: a randomized controlled trial. *Obstet Gynecol* 2018; 132.

The authors provided this information as a supplement to their article.

©2018 American College of Obstetricians and Gynecologists.

|                                                                                                                     |                       |    |
|---------------------------------------------------------------------------------------------------------------------|-----------------------|----|
| Drexel University College of Medicine, Philadelphia, PA 19102, United States                                        | Della Badia, Carl     | 4  |
| Bluegrass Clinical Research, Inc., Louisville, KY 40291, United States                                              | Donovan, Arthur       | 2  |
| University Hospitals of Cleveland, MacDonald Womens Hospital, Cleveland, OH 44106, United States                    | Gangestad, Angelina   | 3  |
| Dr. Phyllis Gee, Frisco, TX 75035, United States                                                                    | Gee, Phyllis          | 4  |
| Greenville Pharmaceutical Research, Greenville, SC 29615, United States                                             | Godwin, David         | 1  |
| Masters of Clinical Research, Inc., Augusta, GA 30909, United States                                                | Grossman, Peter       | 2  |
| Liverpool Womens Hospital NHS, Foundation Trust, Liverpool, L8 7SS, United Kingdom                                  | Hapangama, Dharani    | 1  |
| North Spokane Women's Health, Spokane, WA 99207, United States                                                      | Hardy, Ronald         | 1  |
| Axis Clinical Trials, Los Angeles, CA 90036, United States                                                          | Hazan, Lydie          | 2  |
| Clinical Trials of Texas, Inc., San Antonio, TX 78229, United States                                                | Hedges, Parke         | 3  |
| Great Lakes Research Group, Inc., Bay City, MI 48706, United States                                                 | Heilbronn, Jr., Duane | 1  |
| The Woman's Hospital of Texas, Clinical Research Center, Clinical Research Center, Houston, TX 77054, United States | Hurtado, Sandra       | 11 |
| Research Across America, Dallas, TX 75234, United States                                                            | Kapusta, Ronald       | 2  |
| Precision Research Organization, LLC., Miami Lakes, FL 33016, United States                                         | Klein, Robert         | 2  |
| Medical Center for Clinical Research, San Diego, CA 92108, United States                                            | Koltun, William       | 2  |
| National Institute of Clinical Research, Los Angeles, CA 90057, United States                                       | Lang, L. Khadijah     | 9  |
| Altus Research, Inc, Lake Worth, FL 33461, United States                                                            | Lederman, Samuel      | 2  |
| The Corvallis Clinic, PC, Corvallis, OR 97330, United States                                                        | Lee, Amey             | 1  |
| Meridien Research, St. Petersburg, FL 33709, United States                                                          | Lefebvre, Gigi        | 2  |
| Carolina Women's Research and, Wellness Center, Durham, NC 27713, United States                                     | Lukes, Andrea         | 3  |
| Mobile, Ob-Gyn, P.C., Mobile, AL 36608, United States                                                               | Madonia, Phillip      | 2  |
| Lynn Institute of the Ozarks, Little Rock, AR 72205, United States                                                  | May, Caroline         | 2  |

Carr BR, Stewart EA, Archer DF, Al-Hendy A, Bradley L, Watts NB, et al. Elagolix alone or with add-back therapy in women with heavy menstrual bleeding and uterine leiomyomas: a randomized controlled trial. *Obstet Gynecol* 2018; 132.

The authors provided this information as a supplement to their article.

©2018 American College of Obstetricians and Gynecologists.

|                                                                                                                         |                          |    |
|-------------------------------------------------------------------------------------------------------------------------|--------------------------|----|
| Instituto Chileno de Medicina, Reproductiva (ICMER), Santiago, Chile                                                    | Miranda, Maria           | 6  |
| Vista Clinical Research, Columbia, SC 29201, United States                                                              | Moore, John              | 7  |
| Tidewater Physicians for Women, Norfolk, VA 23502, United States                                                        | Morgan, Jr., Franklin    | 3  |
| SUNY Downstate Medical Ctr, Brooklyn, NY 11203, United States                                                           | Muneyyirci-Delale, Ozgul | 16 |
| St. Johns Center for Clinical Research, Ponte Vedra Beach, FL 32081, United States                                      | Myers, Richard           | 2  |
| University of Toledo-HSC, Toledo, OH 43614, United States                                                               | Neuhoff, Ronica          | 1  |
| Praetorian Pharmaceutical Research, LLC, SMarrero, LA 70072, United States                                              | Nicholson-Uhl, C. Scott  | 1  |
| Futura Research, Inc., Norwalk, CA 90650, United States                                                                 | Nieto, Sandra            | 5  |
| KO Clinical Research, LLC, Fort Lauderdale , FL 33316, United States                                                    | Osman, Khadra            | 3  |
| Lyndhurst Clinical Research, Winston-Salem, NC 27103, United States                                                     | Parker, Jr., Robert      | 9  |
| Women Under Study, New Orleans , LA 70115, United States                                                                | Perez, Brandon           | 2  |
| Advanced Research Institute, Inc., New Port Richey, FL 34653, United States                                             | Perez, Hugo              | 2  |
| The Jackson Clinic, PA, Jackson, TN 38305, United States                                                                | Pierce, William          | 2  |
| Advances in Health, Inc., Houston, TX 77030, United States                                                              | Poindexter, Alfred       | 12 |
| Royal Preston Hospital, Lanchashire Teaching Hospitals NHS, Foundation Trust, Fulwood, Preston, PR2 9HT, United Kingdom | Prashar, Sanjeev         | 1  |
| University Hospital Coventry and, Warwickshire NHS Trust, Coventry, CV2 2DX, United Kingdom                             | Quenby, Siobhan          | 1  |
| South Florida Clinical Research, Institute, LLC, Margate, FL 33063, United States                                       | Reynolds, Ivonne         | 6  |
| Collaborative NeuroScience Network,, Inc., Long Beach, CA 90806, United States                                          | Reynolds, Steven         | 1  |
| Clinica Davila, Departamento de Ginecologia, Recoleta, Santiago,, Chile                                                 | Roa, Eutimio             | 2  |
| Dr. Henry Rodriguez Ginorio, San, Juan, PR, San Juan, 00917, Puerto Rico                                                | Rodriguez Ginorio, Henry | 1  |
| Centro de Investigaciones Clinicas, Vina del Mar, Jardin del Mar, Renaca - Vina del Mar, Chile                          | Rojas, Sergio            | 1  |

Carr BR, Stewart EA, Archer DF, Al-Hendy A, Bradley L, Watts NB, et al. Elagolix alone or with add-back therapy in women with heavy menstrual bleeding and uterine leiomyomas: a randomized controlled trial. *Obstet Gynecol* 2018; 132.

The authors provided this information as a supplement to their article.

©2018 American College of Obstetricians and Gynecologists.

|                                                                                                                                   |                            |    |
|-----------------------------------------------------------------------------------------------------------------------------------|----------------------------|----|
| University of Puerto Rico, School of, Medicine, Univ District Hospital, Medical, Sciences Campus, Rio Piedras, 00935, Puerto Rico | Romaguera-Agrait, Josefina | 2  |
| MacArthur OB/GYN, Irving, TX 75062, United States                                                                                 | Sakovich, Stephen          | 4  |
| Minimal Invasive Gynecologic Surgery, and Endometriosis Cente, San Juan, 00909, Puerto Rico                                       | Salgado-Morales, Juan      | 1  |
| Complete Healthcare for Women, Columbus, OH 43231, United States                                                                  | Samuel, Milroy             | 3  |
| MedStar Washington Hospital Center, Washington, DC 20010, United States                                                           | Scott, Rachel              | 1  |
| Billings Clinic Research Center, Billings, MT 59101, United States                                                                | Severa, Larry              | 21 |
| James A. Simon, MD, PC, Washington, DC 20036, United States                                                                       | Simon, James               | 5  |
| Howard University Hospital, Washington, DC 20060, United States                                                                   | Smith, Kevin               | 2  |
| DCT-Genesis HCWC, LLC, dba Discovery Clinical Trials, Dallas, TX 75231, United States                                             | Smith, Liesl               | 8  |
| Grossmont Center for Clinical, Research, La Mesa, CA 91942, United States                                                         | Smith-Nguyen, Gioi         | 2  |
| Center for Womens Research, Chicago, IL 60612, United States                                                                      | Soltes, Barbara            | 4  |
| Alabama Clinical Therapeutics, LLC, Birmingham, AL 35235, United States                                                           | Summers, William           | 5  |
| Victory Reproductive Care, ON N8W 5R7, Canada                                                                                     | Victory, Rahi              | 1  |
| Instituto de Investigaciones Materno, Infantil (IDIMI), Hospital Clinic Santa Rosa 1234, Santiago, Chile                          | Villarroel, Claudio        | 7  |
| Clinical Research of West Florida, Inc., Clearwater, FL 33765, United States                                                      | Walter, Thomas             | 5  |
| Atlanta Womens Research Institute, Atlanta, GA 30342, United States                                                               | Zane, Richard              | 7  |

\*All listed sites had patients randomized in Cohort 2.

Carr BR, Stewart EA, Archer DF, Al-Hendy A, Bradley L, Watts NB, et al. Elagolix alone or with add-back therapy in women with heavy menstrual bleeding and uterine leiomyomas: a randomized controlled trial. *Obstet Gynecol* 2018; 132.

The authors provided this information as a supplement to their article.

©2018 American College of Obstetricians and Gynecologists.

### Appendix 3. Supplemental Methods

During the study, women were required to use two non-hormonal forms of contraceptives (excluding intrauterine devices), and pregnancy tests were conducted monthly. Women were directed to take 400 IU vitamin D, 500 to 1000mg calcium, and if they were anemic at screening (hemoglobin <12g/dL), an iron supplement.

Endometrial biopsies were performed during screening and Month 6 (or at premature discontinuation) and read centrally (Q<sup>2</sup> Solutions, Valencia, CA). Vital signs and clinical laboratory tests, including lipid panel, hemoglobin, liver function tests, hormone and bone biomarker concentrations, were collected at screening, baseline, each treatment month or time of premature discontinuation, and clinical laboratory tests were read centrally (estradiol and progesterone, AbbVie, North Chicago, IL; all others, Q<sup>2</sup> Solutions, Valencia, CA).

The percentage of women who had menstrual blood loss volume of <80mL at the final month and separately, the percentage of women who had a ≥50% reduction in menstrual blood loss volume from baseline to final month, were each analyzed using a logistic regression model including treatment as the main factor and baseline menstrual blood loss volume as a covariate to compare versus placebo. The mean percent change from baseline to final month in menstrual blood loss volume was analyzed with a 1-way analysis of covariance with treatment as the factor and baseline as a covariate. Imputation methods for menstrual blood loss volume were the same as the primary endpoint.

The percentage of women who achieved amenorrhea or suppression of bleeding were each compared versus placebo using the Fisher's exact test, excluding women with <66 days of treatment. Amenorrhea was defined as having 0 days of bleeding or spotting during the last 56 days of treatment; if there was no sanitary product returned and there were 0 days of bleeding or spotting indicated by the e-diary, the woman

Carr BR, Stewart EA, Archer DF, Al-Hendy A, Bradley L, Watts NB, et al. Elagolix alone or with add-back therapy in women with heavy menstrual bleeding and uterine leiomyomas: a randomized controlled trial. *Obstet Gynecol* 2018; 132.

The authors provided this information as a supplement to their article.

©2018 American College of Obstetricians and Gynecologists.



was considered amenorrheic. Suppression of bleeding allowed spotting but no bleeding during the last 56 days of treatment. The mean change from baseline to final visit in hemoglobin concentration was compared versus placebo using a 1-way analysis of covariance model with treatment as the factor and baseline as a covariate.

The percent change from baseline in the total leiomyoma volume (3 largest leiomyomas) and uterine volume were compared versus placebo using a Kruskal-Wallis analysis with treatment as a factor using observed data. Mean change from baseline to the final month in Uterine Fibroid Symptom and Health Related Quality of Life Questionnaire Symptom Severity and Health Related Quality of Life total scores were analyzed using analysis of covariance using observed data, with treatment as the main factor and baseline score as a covariate to compare versus placebo.

Adverse events were coded using the Medical Dictionary for Regulatory Activities (MedDRA) dictionary and summarized by preferred term for each treatment group. Mean change from baseline to Month 6 in high-density cholesterol (HDL), low-density cholesterol (LDL), triglycerides, total cholesterol and HDL:LDL ratio were compared versus placebo using an analysis of covariance model, with treatment as the main effect and the baseline value of corresponding parameter as a covariate.

Mean percent change from baseline to Month 6 in bone mineral density of the lumbar spine, total hip and femoral neck were analyzed using a 1-way analysis of variance for comparing versus placebo. Analyses of the bone biomarkers C-terminal collagen telopeptide (resorption) and procollagen type 1 N-terminal propeptide (bone formation) were exploratory. Mean change from baseline to Months 3 and 6 were

Carr BR, Stewart EA, Archer DF, Al-Hendy A, Bradley L, Watts NB, et al. Elagolix alone or with add-back therapy in women with heavy menstrual bleeding and uterine leiomyomas: a randomized controlled trial. *Obstet Gynecol* 2018; 132.

The authors provided this information as a supplement to their article.

©2018 American College of Obstetricians and Gynecologists.

compared between elagolix groups and placebo as well as each elagolix alone group with its corresponding elagolix with add-back group, using a 1-way analysis of variance.

Carr BR, Stewart EA, Archer DF, Al-Hendy A, Bradley L, Watts NB, et al. Elagolix alone or with add-back therapy in women with heavy menstrual bleeding and uterine leiomyomas: a randomized controlled trial. *Obstet Gynecol* 2018; 132.

The authors provided this information as a supplement to their article.

©2018 American College of Obstetricians and Gynecologists.

## Appendix 4. Mean Change from Baseline in Bone Resorption and Formation Biomarkers

### A. Cohort 1

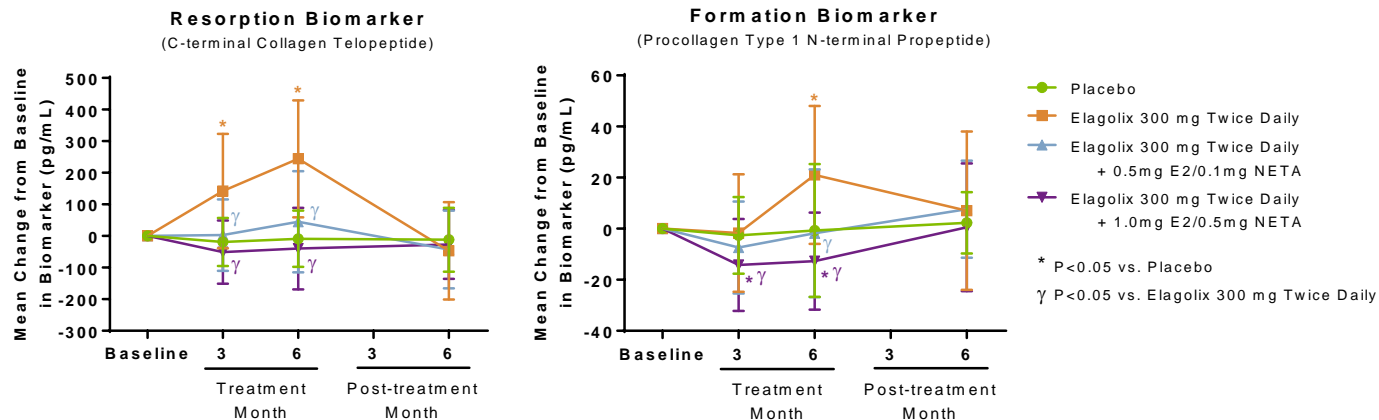

### B. Cohort 2

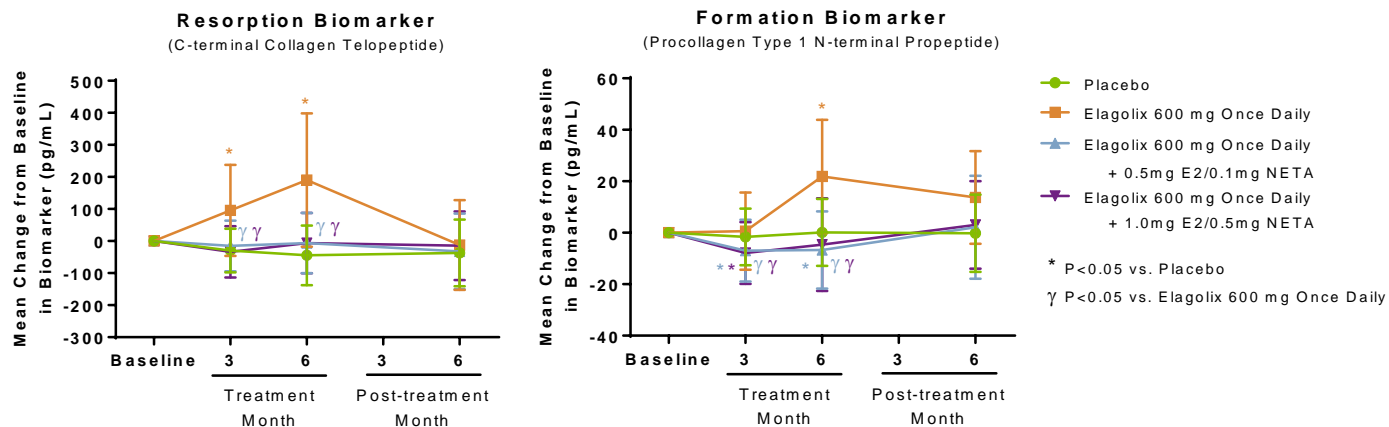

Significance (P<0.05) versus placebo (asterisks) and versus the elagolix alone group (γ) were tested in an exploratory analysis using an analysis of variance model with treatment as the main effect using observed data. E2= estradiol; NETA= norethindrone acetate

Carr BR, Stewart EA, Archer DF, Al-Hendy A, Bradley L, Watts NB, et al. Elagolix alone or with add-back therapy in women with heavy menstrual bleeding and uterine leiomyomas: a randomized controlled trial. *Obstet Gynecol* 2018; 132.

The authors provided this information as a supplement to their article.

©2018 American College of Obstetricians and Gynecologists.

**Appendix 5. Median and Mean Estradiol and Progesterone Levels at Baseline and from Months 1-6**

|                                           | Placebo<br>(N=64) | Elagolix 300 mg twice daily   |                                        |                                        | Placebo<br>(N=76) | Elagolix 600 mg daily         |                                         |                                      |
|-------------------------------------------|-------------------|-------------------------------|----------------------------------------|----------------------------------------|-------------------|-------------------------------|-----------------------------------------|--------------------------------------|
|                                           |                   | Without<br>Add-back<br>(N=61) | +0.5 mg<br>E2/0.1 mg<br>NETA<br>(N=58) | +1.0 mg<br>E2/0.5 mg<br>NETA<br>(N=61) |                   | Without<br>Add-back<br>(N=71) | +0.5 mg E2/<br>0.1 mg<br>NETA<br>(N=72) | +1.0 mg E2/<br>0.5 mg NETA<br>(N=74) |
| <b>Estradiol Concentration, pg/mL</b>     |                   |                               |                                        |                                        |                   |                               |                                         |                                      |
| Baseline, Median                          | 53                | 70                            | 51                                     | 51                                     | 76                | 57                            | 53                                      | 53                                   |
| Mean (SD)                                 | 81 (83)           | 84 (64)                       | 73 (58)                                | 89 (86)                                | 96 (73)           | 82 (69)                       | 87 (84)                                 | 76 (78)                              |
| Months 1-6, Median                        | 94                | 12                            | 30                                     | 61                                     | 82                | 12                            | 34                                      | 66                                   |
| Mean (SD)                                 | 100 (60)          | 15 (13)                       | 38 (30)                                | 69 (46)                                | 95 (56)           | 20 (20)                       | 45 (31)                                 | 78 (50)                              |
| <b>Progesterone Concentration, nmol/L</b> |                   |                               |                                        |                                        |                   |                               |                                         |                                      |
| Baseline, Median                          | 0.4               | 0.4                           | 0.4                                    | 0.4                                    | 0.4               | 0.4                           | 0.4                                     | 0.4                                  |
| Mean (SD)                                 | 0.8 (2)           | 0.5 (0.5)                     | 0.7 (0.7)                              | 2 (7)                                  | 2 (8)             | 0.9 (2)                       | 0.9 (2)                                 | 0.5 (0.6)                            |
| Months 1-6, Median                        | 0.4               | 0.4                           | 0.4                                    | 0.4                                    | 1                 | 0.4                           | 0.4                                     | 0.4                                  |
| Mean (SD)                                 | 5 (9)             | 0.8 (3)                       | 2 (8)                                  | 1 (3)                                  | 6 (10)            | 0.7 (2)                       | 1.2 (5)                                 | 0.6 (2)                              |

Based on observed data. E2= estradiol; NETA= norethindrone acetate

Carr BR, Stewart EA, Archer DF, Al-Hendy A, Bradley L, Watts NB, et al. Elagolix alone or with add-back therapy in women with heavy menstrual bleeding and uterine leiomyomas: a randomized controlled trial. *Obstet Gynecol* 2018; 132.

The authors provided this information as a supplement to their article.

©2018 American College of Obstetricians and Gynecologists.

**Appendix 6. Mean Percent Change in Serum Lipid Concentration During Treatment and Posttreatment Period**

| Mean (SD) Percent Change                                                            | Placebo (N=64) | Elagolix 300 mg twice daily |                               |                               | Placebo (N=76) | Elagolix 600 mg daily   |                               |                               |
|-------------------------------------------------------------------------------------|----------------|-----------------------------|-------------------------------|-------------------------------|----------------|-------------------------|-------------------------------|-------------------------------|
|                                                                                     |                | Without Add-back (N=61)     | +0.5 mg E2/0.1 mg NETA (N=58) | +1.0 mg E2/0.5 mg NETA (N=61) |                | Without Add-back (N=71) | +0.5 mg E2/0.1 mg NETA (N=72) | +1.0 mg E2/0.5 mg NETA (N=74) |
| <b>Mean (SD) Percent Change from Baseline to Month 6</b>                            |                |                             |                               |                               |                |                         |                               |                               |
| Total cholesterol                                                                   | 1.2 (12.8)     | 19.2 (14.2)*                | 14.7 (15.0)*                  | 7.4 (17.5)*                   | -1.7 (11.4)    | 11.8 (18.9)*            | 13.1 (15.8)*                  | 7.6 (12.7)*                   |
| LDL-C                                                                               | 0.5 (18.2)     | 25.5 (22.6)*                | 18.3 (23.1)*                  | 7.5 (26.7)                    | -1.1 (19.8)    | 18.0 (29.9)*            | 18.0 (22.8)*                  | 12.7 (20.4)*                  |
| HDL-C                                                                               | 3.0 (14.3)     | 13.5 (17.5)*                | 10.6 (15.8)*                  | 6.6 (18.0)                    | 2.5 (14.8)     | 5.7 (16.9)              | 9.7 (16.4)*                   | 3.2 (16.3)                    |
| Triglycerides                                                                       | 12.8 (39.2)    | 19.4 (37.0)                 | 22.3 (39.9)                   | 17.1 (43.2)                   | -4.7 (29.3)    | 14.0 (39.8)*            | 15.6 (44.1)*                  | 8.7 (38.8)*                   |
| LDL-C/HDL-C                                                                         | -1.2 (21.9)    | 13.9 (23.0)*                | 8.8 (23.4)*                   | 2.9 (25.5)                    | -2.1 (23.3)    | 14.5 (29.3)*            | 9.8 (22.7)*                   | 10.2 (29.4)*                  |
| <b>Mean (SD) Percent Change from Baseline to Post-Treatment Month 3<sup>a</sup></b> |                |                             |                               |                               |                |                         |                               |                               |
| Total cholesterol                                                                   | -0.8 (12.0)    | 4.1 (13.4)                  | 3.1 (12.0)                    | 1.0 (0.5)                     | -1.1 (10.5)    | 1.4 (13.3)              | 0.7 (13.3)                    | 0.6 (10.4)                    |
| LDL-C                                                                               | -1.4 (19.1)    | 4.3 (17.1)                  | 4.3 (20.3)                    | 1.2 (17.1)                    | -1.5 (15.7)    | 3.8 (20.6)              | 0.2 (19.0)                    | 3.2 (19.0)                    |
| HDL-C                                                                               | -1.0 (13.3)    | 7.4 (22.7)                  | 3.3 (13.9)                    | 3.0 (15.5)                    | 0.4 (15.6)     | 2.5 (16.2)              | 3.3 (16.6)                    | 0.7 (13.4)                    |
| Triglycerides                                                                       | 14.5 (48.9)    | 10.0 (42.4)                 | 10.0 (37.0)                   | 2.2 (36.7)                    | 8.0 (41.1)     | -0.7 (37.7)             | 7.7 (41.7)                    | 3.8 (31.3)                    |
| LDL-C/HDL-C                                                                         | 0.4 (21.0)     | 1.4 (21.4)                  | 2.6 (21.2)                    | 0.1 (21.0)                    | -0.4 (20.4)    | 3.9 (23.6)              | 0.2 (19.2)                    | 3.7 (29.1)                    |
| <b>Mean (SD) Percent Change from Baseline to Post-Treatment Month 6<sup>a</sup></b> |                |                             |                               |                               |                |                         |                               |                               |
| Total cholesterol                                                                   | -0.2 (11.6)    | 5.9 (12.1)                  | 3.5 (12.0)                    | -0.2 (12.5)                   | -3.9 (8.5)     | -0.9 (10.4)             | 1.2 (16.1)                    | -0.3 (12.4)                   |
| LDL-C                                                                               | -0.03 (20.6)   | 6.9 (20.1)                  | 3.9 (20.2)                    | -2.9 (17.5)                   | -5.2 (14.3)    | -0.01 (15.9)            | 1.2 (26.2)                    | 0.3 (18.3)                    |
| HDL-C                                                                               | -1.8 (18.1)    | 6.7 (18.0)                  | 4.6 (17.3)                    | 2.7 (14.4)                    | -2.5 (14.9)    | -0.5 (15.2)             | 1.1 (17.8)                    | 0.4 (11.5)                    |
| Triglycerides                                                                       | 21.7 (63.0)    | 19.4 (51.3)                 | 21.4 (44.2)                   | 4.8 (37.4)                    | 7.1 (53.0)     | 2.4 (29.6)              | 20.1 (56.7)                   | 4.6 (43.1)                    |
| LDL-C/HDL-C                                                                         | 1.4 (23.1)     | 4.6 (26.0)                  | 1.1 (22.4)                    | -3.6 (22.2)                   | -1.1 (20.2)    | 3.1 (21.5)              | 2.0 (24.0)                    | 0.4 (17.4)                    |

a. Mean (SD) changes from baseline to post-treatment Month 3 and 6 were not tested for statistical significance.

Significance versus placebo is indicated (\*) for P<0.05. E2= estradiol; NETA= norethindrone acetate

Carr BR, Stewart EA, Archer DF, Al-Hendy A, Bradley L, Watts NB, et al. Elagolix alone or with add-back therapy in women with heavy menstrual bleeding and uterine leiomyomas: a randomized controlled trial. *Obstet Gynecol* 2018; 132.

The authors provided this information as a supplement to their article.

©2018 American College of Obstetricians and Gynecologists.

**Appendix 7. Mean Changes in Liver Enzyme Serum Concentration**

|                                     | Placebo     | Elagolix 300 mg twice daily |                        |                        | Placebo     | Elagolix 600 mg daily |                        |                        |
|-------------------------------------|-------------|-----------------------------|------------------------|------------------------|-------------|-----------------------|------------------------|------------------------|
|                                     |             | Without Add-back            | +0.5 mg E2/0.1 mg NETA | +1.0 mg E2/0.5 mg NETA |             | Without Add-back      | +0.5 mg E2/0.1 mg NETA | +1.0 mg E2/0.5 mg NETA |
| <b>Mean (SD)</b>                    | N=64        | N=61                        | N=58                   | N=61                   | N=76        | N=71                  | N=72                   | N=74                   |
| Alanine aminotransferase, units/L   | -22.8 (156) | 7.3 (23.3)                  | 1.4 (9.5)              | 0.3 (19.8)             | 0.8 (13.9)  | 3.3 (17.3)            | -0.4 (4.9)             | -1.9 (6.4)             |
| Aspartate aminotransferase, units/L | -19.3 (132) | 3.9 (14.5)                  | 0.9 (7.0)              | -0.2 (10.1)            | -1.0 (9.1)  | 1.2 (8.5)             | -0.5 (3.3)             | -1.9 (5.2)             |
| Total bilirubin, mg/dL              | 0.02 (0.15) | 0.02 (0.15)                 | 0.00 (0.18)            | 0.04 (0.14)            | 0.00 (0.17) | 0.03 (0.15)           | -0.02 (0.14)           | 0.04 (0.20)            |

Significance versus placebo is indicated (\*) for P≤0.05 using observed data.

Carr BR, Stewart EA, Archer DF, Al-Hendy A, Bradley L, Watts NB, et al. Elagolix alone or with add-back therapy in women with heavy menstrual bleeding and uterine leiomyomas: a randomized controlled trial. *Obstet Gynecol* 2018; 132.

The authors provided this information as a supplement to their article.

©2018 American College of Obstetricians and Gynecologists.

**Appendix 8. Summary of Changes in Endometrial Thickness**

|                                           | Placebo   | Elagolix 300 mg twice daily |                        |                        | Placebo   | Elagolix 600 mg daily |                        |                        |
|-------------------------------------------|-----------|-----------------------------|------------------------|------------------------|-----------|-----------------------|------------------------|------------------------|
|                                           |           | Without Add-back            | +0.5 mg E2/0.1 mg NETA | +1.0 mg E2/0.5 mg NETA |           | Without Add-back      | +0.5 mg E2/0.1 mg NETA | +1.0 mg E2/0.5 mg NETA |
| <b>Endometrial Thickness in mm</b>        | N=43      | N=33                        | N=39                   | N=34                   | N=46      | N=42                  | N=36                   | N=30                   |
| At baseline                               | 7.7       | 7.3                         | 7.1                    | 6.6                    | 7.8       | 7.9                   | 7.2                    | 7.5                    |
| At Month 6                                | 9.7       | 6.8                         | 5.7                    | 6.0                    | 8.2       | 6.3                   | 5.9                    | 6.9                    |
| Mean (SD) change from baseline to month 6 | 2.1 (7.3) | -0.5 (9.6)                  | -1.3 (3.9)*            | -0.6 (3.0)             | 0.4 (5.2) | -1.5 (4.5)*           | -1.3 (3.6)             | -0.6 (3.1)             |

Significance versus placebo is indicated for P≤0.05 (\*) using observed data. E2= estradiol; NETA= norethindrone acetate.

Carr BR, Stewart EA, Archer DF, Al-Hendy A, Bradley L, Watts NB, et al. Elagolix alone or with add-back therapy in women with heavy menstrual bleeding and uterine leiomyomas: a randomized controlled trial. *Obstet Gynecol* 2018; 132.

The authors provided this information as a supplement to their article.

©2018 American College of Obstetricians and Gynecologists.
